# Supplementary material
Source: Springer Nature journal article supplement (https://www.springermedizin.de/resource/supplementary/13049_2012_492_MOESM1_ESM.pdf/9666542)

**PubMed**

**(n = 774)**

**Embase**

**(n = 402)**

**Cochrane**

**Library**

**(n = 35)**

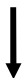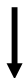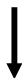

**Total**

**(n = 1,211)**

**Doublettes**

**(n = 49)**

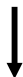

**Number of unique hits**

**(n = 1162)**

Supplement: MOESM1 [file 9666542]
